# Supplementary material for: A novel siderophore system is essential for the growth of Pseudomonas aeruginosa in airway mucus
Source: PubMed Central journal article supplement (PMC4597187; doi:10.1038/srep14644), 2015-10-08
Supplement: srep14644-s1.pdf [file srep14644-s1.pdf]

## Supplementary Information

### **A novel siderophore system is essential for the growth of *Pseudomonas aeruginosa* in airway mucus**

Mia Gi<sup>a#</sup>, Kang-Mu Lee<sup>b#</sup>, Sang Cheol Kim<sup>a</sup>, Joo-Heon Yoon<sup>a</sup>, Sang Sun Yoon<sup>b,c\*</sup>, and  
Jae Young Choi<sup>a\*</sup>

**Table S1. Bacterial strains and plasmids used in this study**

| Strains or plasmids                            | Relevant characteristics                                                                              | Ref. or source |
|------------------------------------------------|-------------------------------------------------------------------------------------------------------|----------------|
| <i>P. aeruginosa</i> strains                   |                                                                                                       |                |
| PAO1                                           | Wild-type PAO1, ATCC                                                                                  | Lab collection |
| $\Delta PA4834$                                | PAO1, <i>PA4834</i> deleted                                                                           | This study     |
| $\Delta pvd$                                   | PAO1, <i>PA2396</i> and <i>PA2397</i> deleted                                                         | This study     |
| $\Delta pch$                                   | PAO1, <i>PA4224</i> and <i>PA4225</i> deleted                                                         | This study     |
| $\Delta pvd\Delta pch$                         | PAO1, <i>PA2396</i> , <i>PA2397</i> , <i>PA4224</i> and <i>PA4225</i> deleted                         | This study     |
| $\Delta PA4834\Delta pvd$                      | PAO1, <i>PA4834</i> , <i>PA2396</i> and <i>PA2397</i> deleted                                         | This study     |
| $\Delta PA4834\Delta pch$                      | PAO1, <i>PA4834</i> , <i>PA4224</i> and <i>PA4225</i> deleted                                         | This study     |
| $\Delta PA4834\Delta pvd\Delta pch$            | PAO1, <i>PA4834</i> , <i>PA2396</i> , <i>PA2397</i> , <i>PA4224</i> and <i>PA4225</i> deleted         | This study     |
| $\Delta PA4834::Tn$                            | <i>PW9128</i> , <i>PA4834::ISlacZ/hah</i> , UW strain                                                 | 60             |
| $\Delta PA4834/pJN105$                         | $\Delta PA4834$ , empty vector control                                                                | This study     |
| $\Delta PA4834/pJN105::PA4834$                 | $\Delta PA4834$ complementation strain                                                                | This study     |
| <i>E. coli</i> strains                         |                                                                                                       |                |
| SM10/ $\lambda$ pir                            | $Km^r$ <i>thi-1 thr leu tonA lacY supE recA::RP4-2-Tc::Mu pir<sup>+</sup></i> , for conjugal transfer | 61             |
| Other bacterial species                        |                                                                                                       |                |
| <i>Staphylococcus aureus</i>                   |                                                                                                       | Lab collection |
| <i>Bacillus cereus</i>                         |                                                                                                       | Lab collection |
| <i>Escherichia coli</i>                        | DH5 $\alpha$                                                                                          | Lab collection |
| <i>Vibrio cholerae</i>                         | N16961                                                                                                | Lab collection |
| <i>Salmonella enterica</i> serovar Typhimurium | LT2                                                                                                   | Lab collection |
| <i>Listeria monocytogenes</i>                  |                                                                                                       | Lab collection |
| Plasmids                                       |                                                                                                       |                |
| pCVD442                                        | <i>sacB</i> suicide vector from plasmid pUM24                                                         | 61             |
| pJN105                                         | pJN105 <i>araC</i> -PBAD cassette cloned in pBBR1MCS-5, $Gm^r$                                        | 57             |
| pJN105:: <i>PA4834</i>                         | pJN105 inducible vector with fragment of <i>PA4834</i>                                                | This study     |

**Table S2. Primers used in this study**

| Gene name                                         | Direction | Primer sequence (5'-3') <sup>a</sup>     | Restriction sites |
|---------------------------------------------------|-----------|------------------------------------------|-------------------|
| <b>Mutant construction</b>                        |           |                                          |                   |
| <i>PA4834</i> left                                | Forward   | ATATAGAGCT <u>CGCCGAGCGCCAGGAATACCTG</u> | SacI              |
| <i>PA4834</i> left                                | Reverse   | TAAATGGAT <u>CCCAGCAGGGTACCGATGGCGC</u>  | BamHI             |
| <i>PA4834</i> right                               | Forward   | CCCTTGGAT <u>CCGGCATCGTCTTCAACGCCGG</u>  | BamHI             |
| <i>PA4834</i> right                               | Reverse   | AAGGTGAGCTCAGCCTTTCTGCCTGGTCACG          | SacI              |
| <i>pvd</i> left                                   | Forward   | ACACGGAGCTCCCTTCCCGTTCGACGAAGGTA         | SacI              |
| <i>pvd</i> left                                   | Reverse   | CTTCCGGATCCTCACCCGACGACACCATCCTC         | BamHI             |
| <i>pvd</i> right                                  | Forward   | AGAGCGGATCCAATGCCTGGCTCGAAGAGCGAC        | BamHI             |
| <i>pvd</i> right                                  | Reverse   | CGATTGAGCTCACTCCTGGAGTGCCTGCC            | SacI              |
| <i>pch</i> left                                   | Forward   | ACACGGAGCTCAATGGCAAGGTCGATCGTCGC         | SacI              |
| <i>Pch</i> left                                   | Reverse   | CTTCCGGATCCAGGTGTTCCAGCAGGGCCTC          | BamHI             |
| <i>pch</i> right                                  | Forward   | AGAGCGGATCCAACCAGCGCAGCCTGGAGGT          | BamHI             |
| <i>pch</i> right                                  | Reverse   | CGATTGAGCTCAGCGTGCCTGATCAGTTGGT          | SacI              |
| <b>complementation</b>                            |           |                                          |                   |
| <i>PA4834</i> complementation (cloning to pET21b) | Forward   | CTTACCATATGGTGCTCGACCTGCTGAAGAGC         | NdeI              |
|                                                   | Reverse   | AAATTAAGCTTGCCCTTCTTCGTCCGCGACAG         | HindIII           |
| <i>PA4834</i> complementation (cloning to pJN105) | Forward   | ACTCTGAATTCAATAATTTTGTAACTTTAAGAAGGAG    | EcoRI             |
|                                                   | Reverse   | ATTGGTCTAGATCAGTGGTGGTGGTGGT             | XbaI              |
| <b>Quantitative RT-PCR</b>                        |           |                                          |                   |
| <i>PA4834</i>                                     | Forward   | GACCTGCTGAAGAGCGGGGT                     |                   |
|                                                   | Reverse   | GCTTCCTTGACCAGGGCGTT                     |                   |
| <i>PA4835</i>                                     | Forward   | TACGTGCACAGTCCGTTCTT                     |                   |
|                                                   | Reverse   | GATAGGTCCCTCCGGGTAGA                     |                   |
| <i>PA4836</i>                                     | Forward   | CTGTTCAACTATCCGGTGGAG                    |                   |
|                                                   | Reverse   | TTCTCCAGGATCAGGGTGTC                     |                   |
| <i>PA4837</i>                                     | Forward   | ACCTTGACAGCGCTCGTATC                     |                   |
|                                                   | Reverse   | AAGCCACGGACGTTGTACTC                     |                   |
| <i>rpoD</i> (PA0576)                              | Forward   | AAGGCCCTGAAGAAGCACGG                     |                   |
|                                                   | Reverse   | GATCGGCATGAACAGCTCGG                     |                   |

<sup>a</sup> Restriction enzyme recognition sequences are underlined.

**Table S3. BLASTN search of PA4834, PA4835, PA4836 and PA4837 gene sequences**

| Genes                                                                                      | PA4834                               | PA4835                    | PA4836                 | PA4837                              |
|--------------------------------------------------------------------------------------------|--------------------------------------|---------------------------|------------------------|-------------------------------------|
| Predicted function                                                                         | EamA-like transporter family protein | Conserved uncharacterized | Nicotianamine synthase | TonB-dependent siderophore receptor |
| <b>Bacterial species that contain genes homologous to PA4834, PA4835, PA4836 or PA4837</b> |                                      |                           |                        |                                     |
| <i>P. aeruginosa</i> PA01                                                                  | 855 / 855 (100%)                     | 1302 / 1302 (100%)        | 792 / 792 (100%)       | 2127 / 2127 (100%)                  |
| <i>P. aeruginosa</i> DK2                                                                   | 855 / 855 (100%)                     | 1296 / 1302 (99%)         | 787 / 792 (99%)        | 2123 / 2127 (99%)                   |
| <i>P. aeruginosa</i> LESB58                                                                | 853 / 855 (99%)                      | 1295 / 1302 (99%)         | 784 / 792 (99%)        | 2114 / 2127 (99%)                   |
| <i>P. aeruginosa</i> M18                                                                   | 853 / 855 (99%)                      | 1296 / 1302 (99%)         | 786 / 792 (99%)        | 2120 / 2127 (99%)                   |
| <i>P. aeruginosa</i> RP73                                                                  | 853 / 855 (99%)                      | 1297 / 1302 (99%)         | 786 / 792 (99%)        | 2118 / 2127 (99%)                   |
| <i>P. aeruginosa</i> PA96                                                                  | 854 / 855 (99%)                      | 1299 / 1302 (99%)         | 785 / 792 (99%)        | 2115 / 2127 (99%)                   |
| <i>P. aeruginosa</i> UCBPP-PA14                                                            | 846 / 854 (99%)                      | 1286 / 1302 (99%)         | 783 / 792 (99%)        | 2108 / 2127 (99%)                   |
| <i>P. aeruginosa</i> PA7                                                                   | 788 / 855 (92%)                      | 1188 / 1302 (91%)         | 757 / 792 (96%)        | 2001 / 2127 (94%)                   |
| <i>P. protegens</i> Cab57                                                                  | —                                    | —                         | —                      | 1436 / 2007 (72%)                   |
| <i>P. stutzeri</i> A1501                                                                   | —                                    | —                         | —                      | 1465 / 2062 (71%)                   |
| <i>P. mendocina</i> ymp                                                                    | —                                    | —                         | —                      | 1478 / 2094 (71%)                   |
| <i>P. mandelii</i> JR-1                                                                    | —                                    | —                         | —                      | 1432 / 2017 (71%)                   |
| <i>Burkholderia</i> sp. 383                                                                | 577 / 828 (70%)                      | —                         | —                      | —                                   |
| <i>Serratia</i> sp. FS14                                                                   | 530 / 782 (68%)                      | 255 / 373 (68%)           | —                      | —                                   |
| <i>Serratia marcescens</i> WW4                                                             | 514 / 759 (68%)                      | —                         | —                      | —                                   |
| <i>Arsenophonus nasoniae</i>                                                               | 487 / 726 (67%)                      | —                         | —                      | —                                   |
| <i>Vibrio nigripulchritudo</i> str. SFn1                                                   | 250 / 385 (65%)                      | —                         | —                      | —                                   |
| <i>Actinosynnema mirum</i> DSM 43827                                                       | —                                    | 207 / 285 (73%)           | —                      | —                                   |
| <i>Bordetella bronchiseptica</i> 253                                                       | —                                    | —                         | 38 / 43 (88%)          | —                                   |
| <i>Bordetella bronchiseptica</i> MO149                                                     | —                                    | —                         | 38 / 43 (88%)          | —                                   |
| <i>Azotobacter vinelandii</i> CA6                                                          | —                                    | —                         | —                      | 1480 / 2023 (73%)                   |
| <i>Azotobacter vinelandii</i> CA                                                           | —                                    | —                         | —                      | 1480 / 2023 (73%)                   |

**Table S4. Antibiotic sensitivity test**

| Antibiotics             | Inhibition zone (mm) |                 |
|-------------------------|----------------------|-----------------|
|                         | PA01                 | $\Delta PA4834$ |
| Amikacin                | 24                   | 26              |
| Ceftazidime             | 27                   | 29              |
| Ciprofloxacin           | 34                   | 33              |
| Gentamicin              | 19                   | 21              |
| Tobramycin              | 26                   | 26              |
| Cefoperazone-sulbactam  | 27                   | 27              |
| Piperacillin            | 28                   | 28              |
| Imipenem                | 24                   | 26              |
| Piperacillin-tazobactam | 29                   | 30              |
| Aztreonam               | 26                   | 27              |
| Meropenem               | 31                   | 31              |
| Cefepime                | 30                   | 31              |
| Colistin                | 13                   | 13              |
